# Supplementary material for: An artesunate-modified half-sandwich iridium(iii) complex inhibits colon cancer cell proliferation and metastasis through the STAT3 pathway
Source: Royal Society of Chemistry journal article supplement (doi:10.1039/d4cb00114a), 2024-12-17

### Western-blot uncropped images

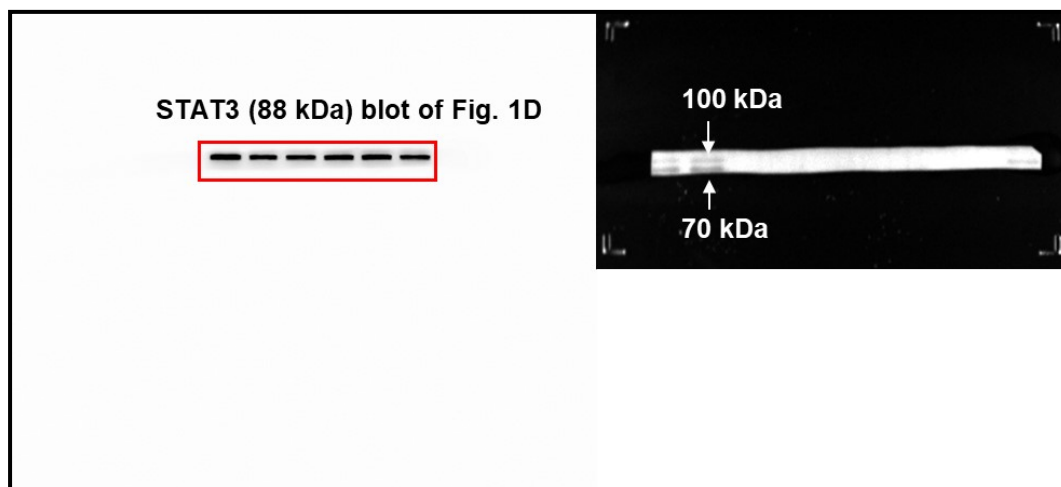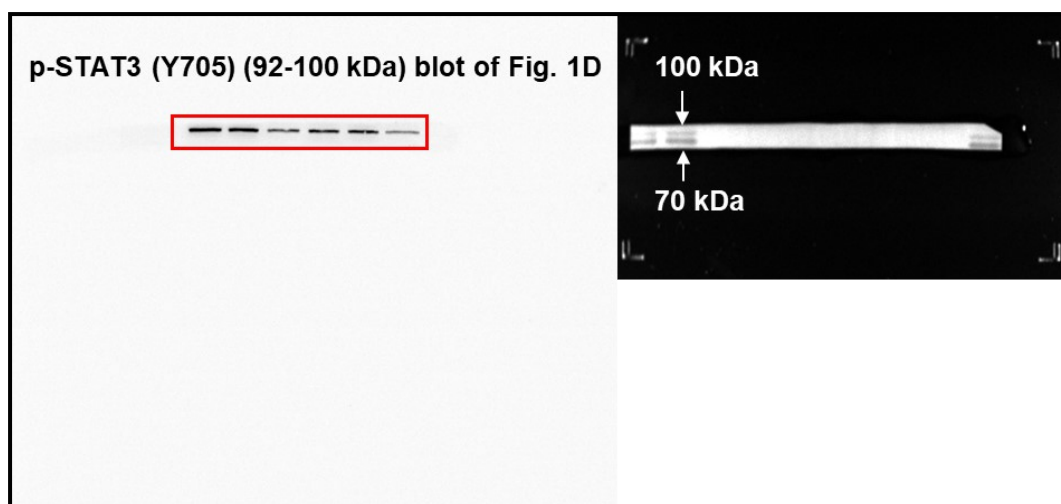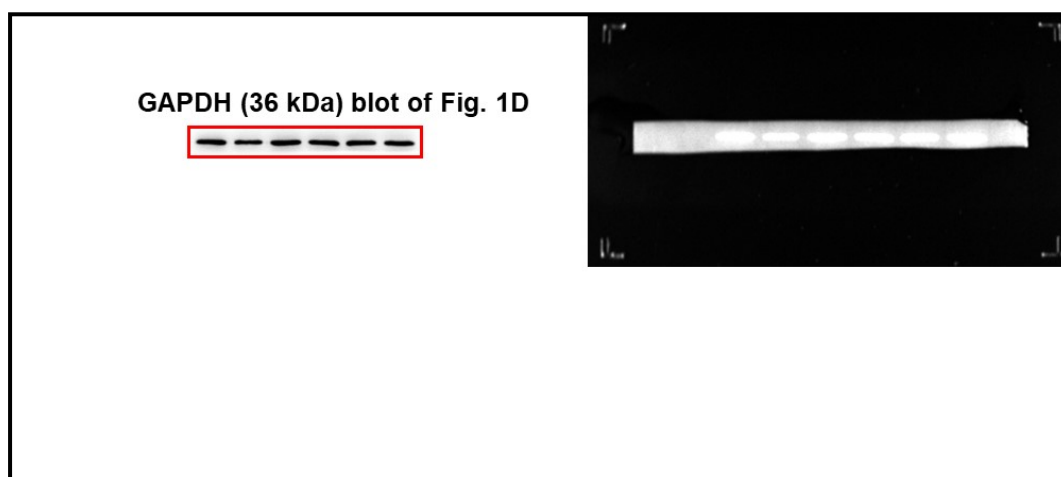

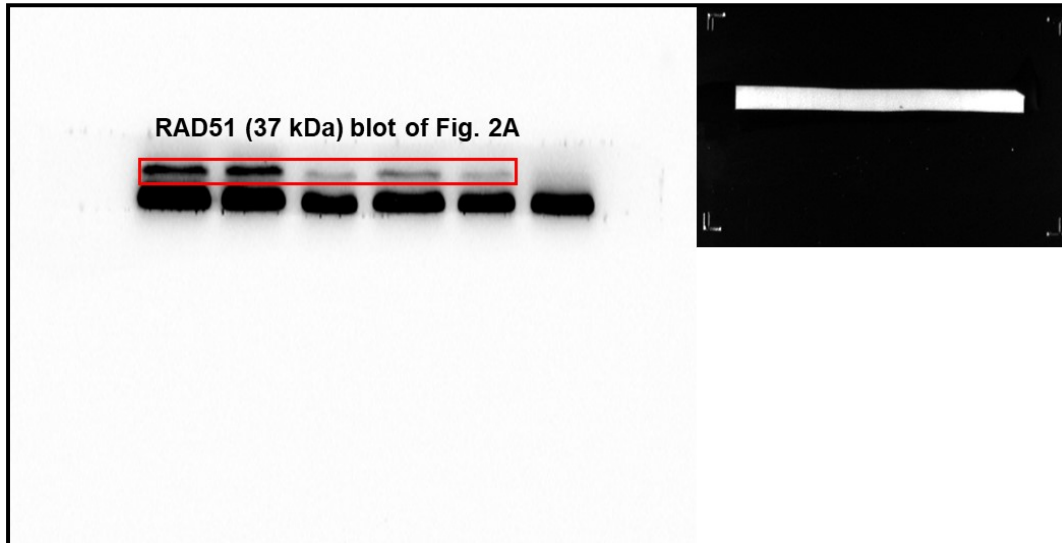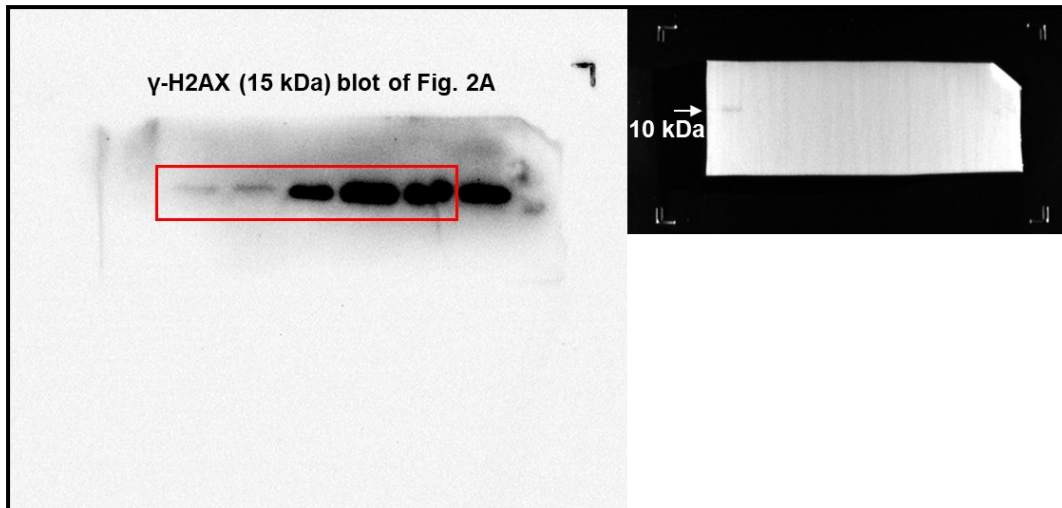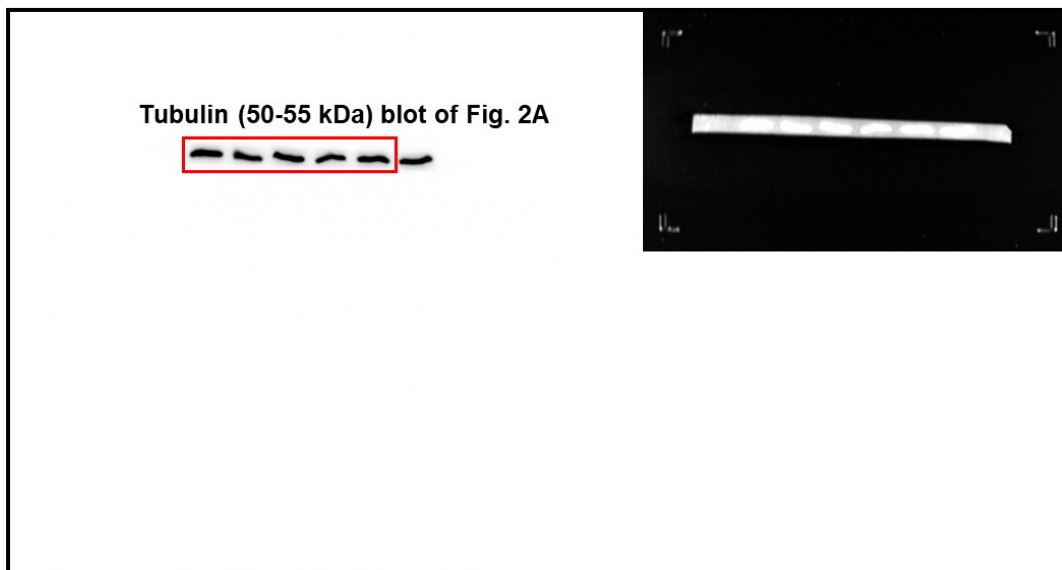

**Cyclin B1 (55-60 kDa) blot of Fig. 2A**

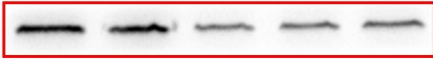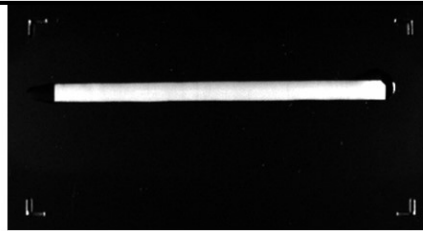

**GAPDH (36 kDa) blot of Fig.2A**

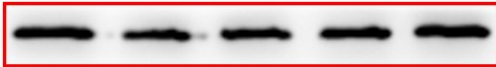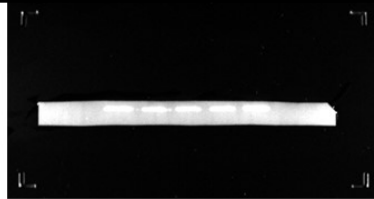

LC3 (14-16 kDa) blot of Fig. 4A

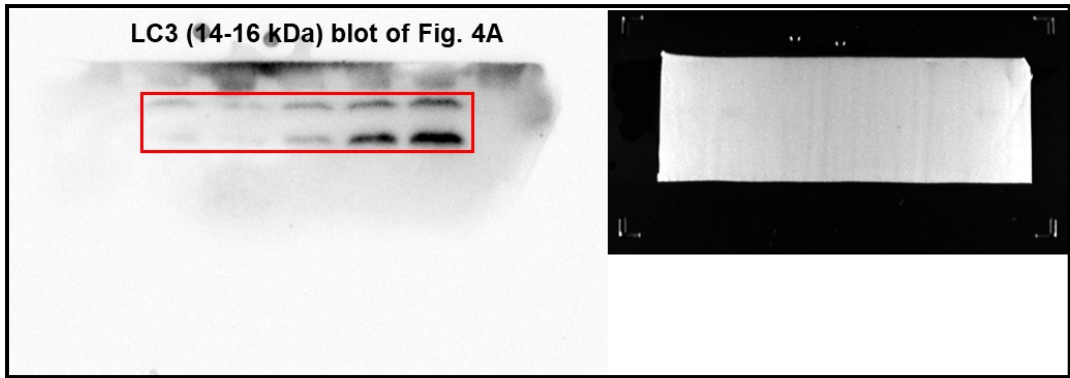

P62 (62 kDa) blot of Fig. 4A

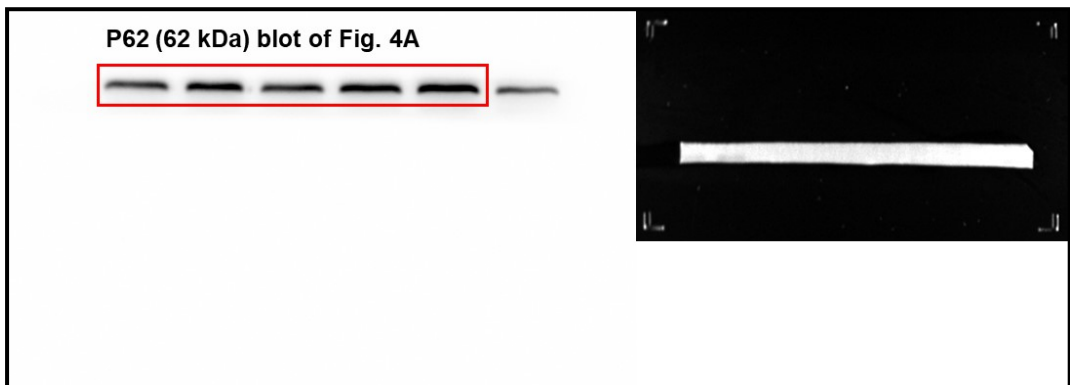

GAPDH (36 kDa) blot of Fig. 4A

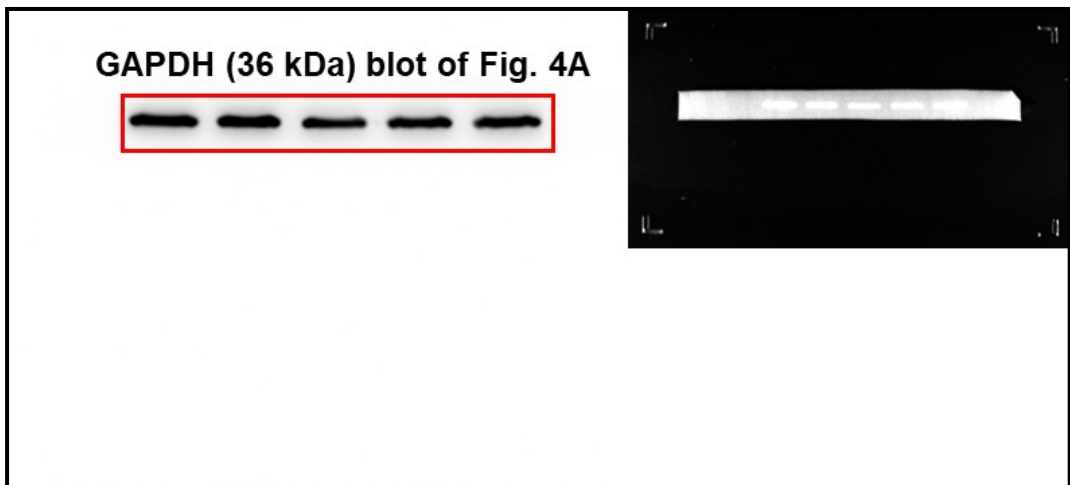

MMP9 (92 kDa) blot of Fig. 5E

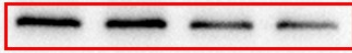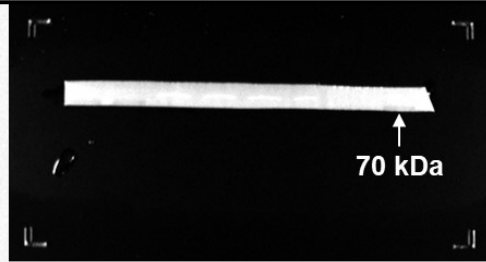

GAPDH (36 kDa) blot of Fig.5E

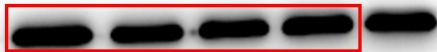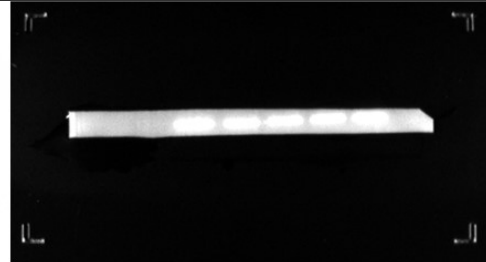

**COX-2 (70-74 kDa) blot of Fig. 6D**

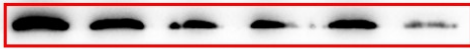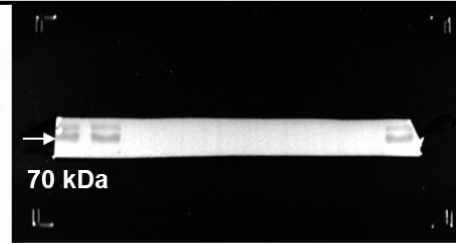

**GAPDH (36 kDa) blot of Fig. 6D**

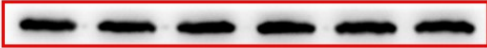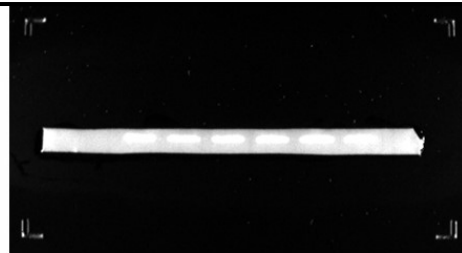

STAT3 (88 kDa) blot of Fig.S12

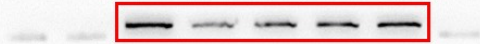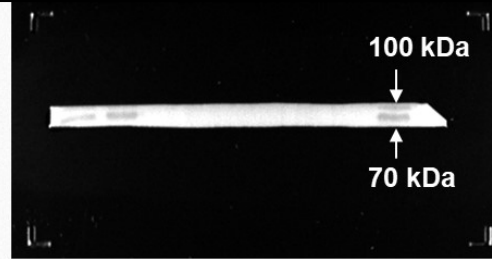

GAPDH (36 kDa) blot of Fig.S12

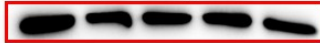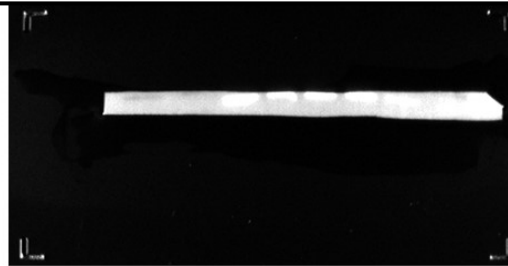

Supplement: d4cb00114a1.pdf [file d4cb00114a1.pdf]
